# Supplementary material for: New diagnostic criteria for gestational diabetes mellitus and their impact on the number of diagnoses and pregnancy outcomes
Source: Springer Nature journal article supplement (doi:10.1007/s00125-017-4506-x), 2017-11-22
Supplement: MOESM1 [file 15246272]

**ESM Table 1      Maternal and neonatal outcomes of interest**

| Outcomes                                     | Definition                                                                                                                                                                                                    |
|----------------------------------------------|---------------------------------------------------------------------------------------------------------------------------------------------------------------------------------------------------------------|
| <b>Maternal</b>                              |                                                                                                                                                                                                               |
| Gestational hypertension                     | A systolic blood pressure $\geq 140$ mmHg and/or a diastolic blood pressure $\geq 90$ mmHg, after 20 weeks of gestation in a previously normotensive woman                                                    |
| Preeclampsia                                 | Gestational hypertension together with the presence of proteinuria ( $\geq 300$ mg/24 hrs.) and also included women who had eclampsia and Hemolysis Elevated Liver enzymes and Low Platelets (HELLP) syndrome |
| Induction of labour                          | Process to start childbirth                                                                                                                                                                                   |
| Mode of delivery                             | Spontaneous vaginal delivery, instrumental delivery, emergency caesarean section, and planned caesarean section                                                                                               |
| Gestational age at delivery                  | The number of weeks that a baby has been in the uterus                                                                                                                                                        |
| <b>Neonatal</b>                              |                                                                                                                                                                                                               |
| Birth weight                                 | Body weight of the baby at birth (grams)                                                                                                                                                                      |
| Neonate born large for gestational age (LGA) | Birth weight $>90$ th percentile corrected for gestational age, sex, parity, and ethnic background                                                                                                            |
| Macrosomia                                   | Birth weight $>4000$ gram                                                                                                                                                                                     |
| Neonate born small for gestational age (SGA) | Birth weight $<10$ th percentile corrected for gestational age, sex, parity, and ethnic background                                                                                                            |
| Birth trauma                                 | Shoulder dystocia, fracture of humerus or clavicle, brachial plexus injury                                                                                                                                    |
| Hypoglycaemia                                | Occurring $>2$ hrs. after birth and defined as a having a blood glucose level $<2.6$ mmol/l or requiring treatment with glucose infusion <sup>a</sup>                                                         |
| Hyperbilirubinaemia                          | Requiring treatment with phototherapy after birth <sup>a</sup>                                                                                                                                                |
| Stillbirth                                   | Delivery of a baby showing no signs of life                                                                                                                                                                   |
| Preterm delivery                             | Delivery $<37$ weeks of gestation                                                                                                                                                                             |
| Requirements for respiratory support         | The need to intubate or apply continuous positive airway pressure                                                                                                                                             |
| Apgar score                                  | Score $<7$ at 5 min                                                                                                                                                                                           |
| Admission to the Neonatology Department      | NICU, Neonatal Intensive Care Unit                                                                                                                                                                            |

<sup>a</sup>Data were collected in primary care (midwives) and secondary care (hospital). In primary care, hypoglycaemia and hyperbilirubinaemia were not reported and measured in all neonates. Therefore we only report the percentages for the WHO-1999 group, as these women delivered in secondary care
